# Supplementary material for: Genome Analysis of Treponema pallidum subsp. pallidum and subsp. pertenue Strains: Most of the Genetic Differences Are Localized in Six Regions
Source: PLoS One. 2010 Dec 29;5(12):e15713. doi: 10.1371/journal.pone.0015713 (PMC3012094; doi:10.1371/journal.pone.0015713)
Supplement: Table S1 — The list of primers used for whole genome fingerprinting (WGF) of treponemal genomes. (XLS) [file pone.0015713.s001.xls]

## Sheet: List1
TPI interval	Primer name	Sequence	Orientation	Coordinates following the Nichols genome (Fraser et al. 1998)		Amplicon (bp)	Lenght (bp)
TPI-1	ES-154R	CGGCTGTATTTCGTTACTGTCTTGA	F	1135699	1135723	11757	25
	ES-72R	GGGTTTGGTAGTGACCTCTCTATGGT	R	9444	9419		26
TPI-2A	ES-71F	TCTCCCGAACGAGTTTCTAGTCTG	F	8920	8943	12502	24
	TP-2AR	TGCGAAAGCATGAAGTGTTC	R	21421	21402		20
TPI-2B	TP-2BF	AACAGCAGGCTCTTTCGGTA	F	21358	21377	7172	20
	ES-74R	AACTTAACGCTGCACATAGTACACACA	R	28529	28503		27
TPI-3	ES-73F	TGTTTTACCAGGTTGCAGGGAC	F	27975	27996	12126	22
	ES-115R	CGGAAAGAAATCCACACGGAG	R	40100	40080		21
TPI-4A	TPI-4AF	CTCCGTGTGGATTTCTTTCCG	F	40080	40100	6348	21
	TPI-4AR	GTCACGCTTCAAAATGGCGCC	R	46427	46407		21
TPI-4B	TPI-4BF	CAGGCGCCATTTTGAAGCGTGACATTT	F	46405	46431	7705	27
	ES-117R	GCGTTTGCATGGGTAAGACTAACTT	R	54109	54085		25
TPI-5A	TPI-5AF	CACCAATGAGAGAACGCATCAGC	F	53354	53376	12087	23
	TPI-5AR	CGTGCTGTTTGGCCGGTACCACC	R	65440	65418		23
TPI-5B	TPI-5BF	CGCTACCACACCCTATCATACCG	F	64800	64822	12643	23
	TPI-5BR	CGGTTGCTGCAACAAGCGCTTCA	R	77442	77420		23
TPI-6	ES-118F	TCATCAAAAAGAAGTACGCTGTAGGG	F	76498	76523	14827	26
	ES-121R	CTCCTCCGCGTACTCCAAGAC	R	91324	91304		21
TPI-7A	TPI-7AF	GCGCCTGATGAAAGTTGACC	F	90757	90776	10792	20
	TPI-7AR	CACGCGCTTCCAAATAGTCC	R	101548	101529		20
TPI-7B	TPI-7BF	CGTGCACATGCACGCCAAACGCG	F	101432	101454	11998	23
	ES-123R	GTAAGAGCGCTTCTACATCCTCACA	R	113429	113405		25
TPI-8	ES-122F	GATTCTGCCGTTTTGGTAACTACTTG	F	113063	113088	5053	26
	ES-162F	TAACTCATGCCCAACAGTAGCTTG	R	118115	118092		24
TPI-9	ES-163R	GGATTGCTTTCTGTGTTTGAGACC	F	117579	117602	5351	24
	ES-151F	TTCACAGATTAACGGCATTGGAC	R	122929	122907		23
TPI-10	ES-152R	ACCGCGGAACGAATCAAGTAG	F	122504	122524	11261	21
	ES-43R	CAATACCCCATCTCTCCGAGC	R	133764	133744		21
TPI-11	ES-42F	TTATCAGCCTGAATCGTATGTCCC	F	133144	133167	12733	24
	ES-35F	ATGTGCAAGTACTCCAACCTCTCG	R	145876	145853		24
TPI-12aa	TP0131-XL-F	AAGCTAAACGAGCCTCCACA	F	150275	150294	5421	20
	ES-50F	TCATACGTTTTTTCGCTCCACAC	R	155695	155673		23
TPI-12A	ES-36R	GGTTGGAGTACTTGCACATGTGG	F	145858	145880	6652	23
	TPI-12AF	CCAGTCCTTCCTGTGTGGTT	R	152509	152490		20
TPI-12B	TPI-12BR	AATAGGCACGGGTGACAAAG	R	152447	152466	3249	20
	ES-50F	TCATACGTTTTTTCGCTCCACAC	F	155695	155673		23
TPI-13	ES-51R	TCTGCCTTACAGGTGACGTCCT	F	154900	154921	4761	22
	ES-25F	CTCCAATACACGAAACTATCTTGCG	R	159660	159636		25
TPI-13B	TPI13F	GTGTGGAGCGAAAAAACGTAT	F	155673	155693	3647	21
	TPI13R	CTTGGCCACAATCGTGATTTG	R	159319	159299		21
TPI-14A	TPI-14AF	TGTATCTGCGTTCCTAATACACC	F	158912	158934	13048	23
	TPI-14AR	CACCTACGCATTCGAGCGATTCG	R	171959	171937		23
TPI-14B	TPI-14BF	AAGCCGACACAGCTCACTCC	F	171319	171338	13877	20
	TPI-14BR	CAACACACGCCTTTCAGCAG	R	185195	185176		20
TPI-15A	ES113R	TGTATGTCGTGCAGTTCTAGCCC	F	183634	183656	9110	23
	TP-15AR	ATGGTCTTAACGGTGGCTTG	R	192743	192724		20
TPI-15B	TP-15BF	GAACTCCACGAGCTTTTTCG	F	191747	191766	14244	20
	ES-110F	CCTGCGCCTTTAAACTTAGGAGAG	R	205990	205967		24
TPI-16A	ES-111R	TCAAGCGTGAAAGATAGGGGTG	F	205606	205627	12376	22
	TPI-16AR	CGCCGCCGCACACTTTCTTCTCCT	R	217981	217958		24
TPI-16B	TPI-16BF	TGGGCAATGGAGGGGTGGTATGTCG	F	217547	217571	12363	25
	ES-44F	CGCCTTTGTACCCGAGCTTAC	R	229909	229889		21
TPI-17A	ES-45R	GAAGCAGAATGCTGTCTCTCGTG	F	229251	229273	14237	23
	TPI-17AR	CTTGTCGCTGGCGCAGTTAA	R	243487	243468		20
TPI-17B1A	17B1-F	TCAAAAGAGGATTGCGAAGG	F	241347	241366	5284	20
	17B1-R1	ATGGTCATAGGATCGCTTGG	R	246630	246611		20
TPI-17B1B	17B1-RF1	AGTGTACGTGGGAAGGGATG	F	245614	245633	5045	20
	17B1-R	GCAGAGAGCGTTCCTTTGTC	R	250658	250639		20
TPI-17B2	TPI-17B2R	CACTGAGCGCGATGAAGAAAT	F	249073	249093	7411	21
	ES-77F	ATGGCGTACGTAGGTCCGTGT	R	256484	256464		21
TPI-18	ES-78R	GCGCAGTAAAAGAGGGACGAC	F	255635	255655	4817	21
	ES-54F	GATCGCTTCGTACTTCCCTAGCTT	R	260451	260428		24
TPI-19	ES-78R	GCGCAGTAAAAGAGGGACGAC	F	255635	255655	6413	21
	ES-56F	CATCATCACGTACAAACCATGAGG	R	262047	262024		24
TPI-20	ES-57R	CCTCTCGCGTTATTGAGGCTC	F	261725	261745	8493	21
	ES-75F	TACTAAGCTTCCTCATCATCGTCTCC	R	270217	270192		26
TPI-21A	21A-F	GCTTACCCTCGCTCTGTTGA	F	268732	268751	7541	20
	21A-R	GATAAAATCCGCGTGTCCTG	R	276272	276253		20
TPI-21C	21C-F	CGCGTCGGTATGTGTAAATC	F	275915	275934	12228	20
	21C-R	CAGCGAGAAAACCTGAATCC	R	288142	288123		20
TPI-21D	21D-F	GATGGGGAAGAAGGAGGAAG	F	287721	287740	5632	20
	21D-R	ACCGTCTCATTCTCGACCTG	R	293352	293333		20
TPI-22	ES-76R	TCCTTTCCGATGAAATGGACCT	F	270004	270025	6995	22
	ES-181F	CAGCGCGGCAGTTCTTATACTTAG	R	276998	276975		24
TPI-23	ES-109R	GTTTCGAACTGGAAAATACGTGTGTAC	F	289715	289741	18499	27
	ES-147F	GACAAGCGAGCGTGTAGGAGTC	R	308213	308192		22
TPI-24A	TPI-24AF	GACTCCTACTCGCTCGCTTGTC	F	308192	308213	8048	22
	TPI-24AR	ACTGCGGTGCCGCTCCACTGG	R	316239	316219		21
TPI-24B	TPI-24BF	CCAGTGGAGCGGCACCGCAGTTAC	F	316219	316242	9020	24
	ES-49R	CCGTGTGGTTCAAATCCAAACT	R	325238	325217		22
TPI-25A	ES-26F	TTCCGAGCCATATCTGCGTACT	F	325002	325023	5764	22
	TPI-25AR	CGTTTAATGTTCTGCGGCCGGTGTTTG	R	330765	330739		27
TPI-25B-A	TPI-25(B)newF	GGGCGCCTTCCGGCAGGACTCT	F	330289	330310	2001	22
	Nich323-R3	TGTGCTGCTTCTGGTTATGC	R	332289	332270		20
TPI-25B-B	Nich323-F2	GAAGACGCAAGCTCTACTGC	F	332036	332055	3821	20
	ES-47R	GGAACCACTATCTCCTTCGAGACAA	R	335856	335832		25
TPI-26	ES-46F	CGTCTCAATGGTCAGGACGTG	F	335558	335578	14792	21
	ES-102R	GCACTATGTATCTGGTCAGGAGCAC	R	350349	350325		25
TPI-27	ES-101F	CCTTGTTATCATGGACGAAGTAGGAC	F	349567	349592	16681	26
	ES-104R	GTAATGCTTGCTGCGACGATTAG	R	366247	366225		23
TPI-28A	ES-103F	TGAAATGTTACGCGCTAGAGGG	R	365594	365615	13925	22
	TPI-28AF	ACCTTACGCCAAAAACATGC	F	379518	379499		20
TPI-28B	TPI-28BR	GTTGTACGGGTCTCCTGCAT	R	377267	377286	11764	20
	ES-105R	GCAACCTCGTAGCCTTCACTTGT	F	389030	389008		23
TPI-29	ES-33F	CAGATTGGTCAAATCTTGACAAGTGA	F	388990	389015	19444	26
	ES-30F	GATCAAGCTCAACCTCCTGGG	R	408433	408413		21
TPI-30A	ES-69R	GTACAATCTCGATGAAAAGGGGC	F	408201	408223	9505	23
	TPI-30AF	GAGCAATCTTGTGCGTTTCA	R	417705	417686		20
TPI-30B	TPI-30BR	CACACGTGGAAAATGGACAG	R	416848	416867	12063	20
	ES-80R	ACATGGACCGCCTTCCTCATA	F	428910	428890		21
TPI-31A	ES-79F	TATACTGTTTTGGTAGATGGGGACGA	F	427959	427984	10405	26
	TPI-31AR	TTAGCGCGAGTGAGAAATCCCGACTGC	R	438363	438337		27
TPI-31B	TPI-31BF	GTGCGTCAGGCGTTGTTGTTGGTTTTG	F	437958	437984	9902	27
	ES-92R	ACTCAAACACCAACCCCCTCTC	R	447859	447838		22
TPI-32A	ES-91F	CACTTTCCTCCGAGGACGTGT	F	447397	447417	10655	21
	TPI-32AR	GCGCCGCACGACGATCAAATGA	R	458051	458030		22
TPI-32B	TPI-32BF	TGTGCCCGGCTATTGGGAGGTAGACAT	F	457658	458684	11107	27
	ES-94R	CTGCGCAACTGTTCCTCCATA	R	468764	468744		21
TPI-33A	ES-93F	TGATGTGATGCAAAGGGTTGAC	F	468467	468488	11795	22
	TPI-33AR	GCCATCGCACATACGTGATGGC	R	480261	480240		22
TPI-33B	TPI-33BF	TTCTACCGATGTGCGTTCTG	F	478327	478346	6489	20
	TPI-33BR1	ATACGGGAAAGGACACGTTG	R	484815	484796		20
TPI-33C	33C-F2	GAGATTTTTGCCGTGCATTC	F	484363	484382	8527	20
	33C-R2	GCTGCCGTATTCTGTTCACC	R	492889	492870		20
TPI-34A	34A-F	CGGCTTCAATTTTTCTCAGC	F	492652	492671	3702	20
	34A-R	CTGATGACGACCAAACAACG	R	496353	496334		20
TPI-34B	34B-F2	GTTGCTTCTTCGGTCTGGTC	F	498833	498852	4730	20
	34B-R1	AAGGATTTGCGTGGAACTTG	R	503562	503543		20
TPI-34aa	34-F3	ACCGCTACAAAGAGGATAGG	F	495206	495225	4751	20
	34-R3	TCTACGCACAAAGAAAGAGC	R	499956	499937		20
TPI-36	ES-161R	GCAGCGCTTCAGGTGATAGTAGAG	F	501228	501251	6931	24
	ES-166F	CTGCAAGCGAATCACTAGGTGTC	R	508158	508136		23
TPI-37	ES-167R	CCTGCAGGGTACGTAAGTAGAGGAC	F	507390	507414	7040	25
	ES-146R	CGCTTTGATGAGGGAATAGAAGAC	R	514429	514406		24
TPI-38A	ES-97F	TGACCCAATGAAATGACCCTTC	R	513763	513784	10476	22
	TPI-38AF	GGATCAAAGGCAGGATTGAA	F	524238	524219		20
TPI-38B	TPI-38BR	CCACCTCCTGTTTACGCATT	R	524167	524186	12053	20
	ES-100R	CAGCATGGTCAGAAGCAATAGGTAG	F	536219	536195		25
TPI-39	ES-106F	GGCAGGGTTACATGCTTGTCTC	F	535637	535658	20815	22
	ES-142R	TTTCTCACGGTGTCCCCTTATG	R	556451	556430		22
TPI-40	ES-58F	TTGGGTATCGCTTACACTCGGA	F	556159	556180	16322	22
	ES-81F	ACGTACGGGAATGAGGATGTACAC	R	572480	572457		24
TPI-41	ES-82R	TCACCACCTTTGACAGTACCCC	F	571737	571758	20309	22
	ES-85F	GTGAGTCATGGATCTGCGAGTG	R	592045	592024		22
TPI-42A	TPI-42AF	GTTCTGCCATGCGCACCGCCATACG	F	591445	591469	10127	25
	TPI-42AR	GCAAGTTCTGCGAAGGTAGCCGCCA	R	601571	601547		25
TPI-42B	TPI-42BF	TGCAAAGCAAATATCGCAATGAGC	F	601025	601048	11204	24
	TPI-42BR	CGGATAATGCTTGCAATGATGT	R	612228	612207		22
TPI-43A	ES-88R	GGATGGAAAATTCGTTGTACCCT	F	611593	611615	5578	23
	TPI-43AF	GCGTTTTCCTGTTGATTGGT	R	617170	617151		20
TPI-43B	TPI-43BR	TACCGTCCATCTGTCCACAA	F	619214	619233	5301	20
	TPI-43BF	AGTTTTTCCCCCACTGCTTT	R	624514	624495		20
TPI-43C	TPI-43CR	ATGCCCTCTCTGCTACCTCA	F	624061	624080	7841	20
	ES-89F	AGGCAATTACCCACGTGACAGA	R	631901	631880		22
TPI-43D	TPI-43DF	ACGGTACAACGGAGAAATCG	F	616200	616219	3993	20
	TPI-43DR	CTGCTCGGTTAGGACTGGAC	R	620192	620173		20
TPI-44	ES-143R	GCGTTTTTCCTGTTCTCCCTCT	F	631372	631393	18747	22
	ES-144F	GGACGCCTCACGTACGTAGATTAC	R	650118	650095		24
TPI-45	ES-145R	CGCATATGCAGCAGGACAAGT	F	649247	649267	10988	21
	ES-38F	AGCGGTAATGATCGGTGTGTG	R	660234	660214		21
TPI-46	ES-39R	CCTTTGCAGAAGAAATCGCATAG	F	660061	660083	7000	23
	ES-41F	AGTGCATAACGCGCTCTAGCA	R	667060	667040		21
TPI-47	ES-171F	GCATAACCGCGTGCTATACGA	F	666106	666126	2003	21
	ES-172R	AGCGCCTCTACATCCTCCATG	R	668108	668088		21
TPI-48A	ES-37R	AGATCGTTCTTGCTATCTCCAATCA	F	667268	667292	5232	25
	TPI-48AF	CCAGTCCTTCCTGTGTGGTT	R	672499	672480		20
TPI-48B	TPI-48B2	AATAGGCACGGGTGACAAAG	F	672437	672456	6291	20
	ES-32F	CCGTAGCGCTTTGCTAAGGAC	R	678727	678707		21
TPI-49	ES-34R	GCCACTCACCTGAAGATTGGAC	F	678390	678411	10216	22
	ES-31F	TCGAAGCGAACCATTTTCCTAAT	R	688605	688583		23
TPI-50A	ES-68R	TGGTTCGCTTCGATTATCATAACTTAA	F	688593	688619	12508	27
	TP-50AR	CCTCTGCGAGCCTACGTATC	R	701100	701081		20
TPI-50B	TP-50BF	CGGGTACGTTTGGACTCTGT	F	698465	698484	10494	20
	ES-66F	GTTTGCGTACTGTACACCGAGTGA	R	708958	708935		24
TPI-51A	ES-67R	AGTCATTGCGTTTTTCTCGGG	F	708207	708227	13509	21
	TPI-51AR	GCGGCGGTGAATGAAATGCTCGAC	R	721715	721692		24
TPI-52	ES-67R	AGTCATTGCGTTTTTCTCGGG	F	708207	708227	15156	21
	ES-170R	GGTCAGATAGGACAAGGGGTCAC	R	723362	723340		23
TPI-53	ES-23R	CATGACCGTTTCAAAGGGCTC	F	721173	721193	16343	21
	ES-22F	CAGTTTGCTCTACCTGCGTCCT	R	737515	737494		22
TPI-54A	TPI-54AF	CGCCCATCAAGACAATCTCC	F	736214	736233	14555	20
	TPI-54AR	CTCGCTTGGAGAAACGCACT	R	750768	750749		20
TPI-54B	TPI-54BF	CTGCCTATCTTCCCGCACTG	F	749283	749302	11560	20
	TPI-54BR	CATGCTCCTTCCCTTTGTGC	R	760842	760823		20
TPI-55	ES-19R	GGGTTGTTTTGCCAGACGACT	F	759691	759711	12697	21
	ES-16F	GTATTACCGCAGTACGCTCAGTCC	R	772387	772364		24
TPI-56A	ES-15R	CCATCGTTACCGTTTTCTCTAGCA	F	771591	771614	7720	24
	TPI-56AF	TTCGCAGGATATTTGGAAGG	R	779310	779291		20
TPI-56B	TPI-56BR	CGTTGCAATATTCGTCTTTCC	F	780020	780040	1017	21
	TPI-56BF	TAGCACAGGAGTTGCAGTCG	R	781036	781017		21
TPI-56C	TPI-56CR	ACCGCACGAAAGTATTCCAC	F	780490	780509	8562	20
	ES-14F	TGAAAATTCAGTAATGGAAGGGGTC	R	789051	789027		25
TPI-56D	TPI-56DF	CAGATAAGGAGGCGCTTGAG	F	778345	778364	2391	20
	TPI-56DR	AACTGGTATTCAGCCACGAG	R	780735	780716		20
TPI-57A	ES-13R	CCGTCACTCATACAATTCCTCCTC	F	788457	788480	11814	24
	TPI-57AR	CAGAAGATGAGGGGGTGACG	R	800270	800251		20
TPI-57B	TPI-57BF	TGCCCATTTCATCAGCAACC	F	799350	799369	11349	20
	ES-10F	CCGGTCATTGATATGACGAGTGT	R	810698	810676		23
TPI-58	ES-9R	GACCTTTACCACAAACCTTCTCGA	F	809864	809887	12343	24
	ES-8F	CGCTGCACTGTACCACAAGTAGAC	R	822206	822183		24
TPI-59	ES-7R	CGTTTACCATTCTCGTCGAGGTACT	F	821444	821468	16482	25
	ES-6F	AATCAAGGCGATGTTCTTGGG	R	837925	837905		21
TPI-60	ES-5R	GGAAAAAAAAGCTACCTCACTCGG	F	837556	837579	21000	24
	ES-2F	AACCACATGGATGCAGTTACAGTGT	R	858555	858531		25
TPI-61	ES-1R	TCAAAGAACGCTCGGACACAC	F	858127	858147	17465	21
	ES-62F	GGTAGAACTATTGTCTGCGTCTCACAT	R	875591	875565		27
TPI-62A	TPI-62AF	GCTCTGCAGGGCTCGCTACATGG	F	874822	874844	13658	23
	TPI-62AR	CACTGCATACGCGTCGGCGTGTCG	R	888479	888456		24
TPI-62B	TPI-62BF	GCGCCTCCTGGCATAGGGCAACC	F	888392	888414	13677	23
	ES-64F	CTCACCTTTTATGTCGGTGTAGATCC	R	902068	902043		26
TPI-63	ES-65R	GCCAGTATTGGAAAAAGTCATAGGG	F	901402	901426	14802	25
	ES-60F	CTCGCCACTCACCTTACACGA	R	916203	916183		21
TPI-64	ES-61R	TTTAATGCGGATCATGAGGTCC	F	915697	915718	11748	22
	ES-149F	GGTGCATTTTGCAGAGTCAAGAG	R	927444	927422		23
TPI-65A	65A-F2	CAATGGGAAGACCAGAGGAG	F	924113	924132	8850	20
	65A-R1	AGAATCCATCAACGCTCTGC	R	932962	932943		20
TPI-65B	TP-65BF	CATGGTTTTGCGGTAGAGGT	F	932750	932769	6977	20
	ES-129R	AAGGCTGCAGATGGTCCAAAG	R	939726	939706		21
TPI-66A	ES-128F	AATAGCCACGGGTCACTAGCATT	F	938830	938852	12037	23
	TPI-66AR	AACGCCGGGGATAAGGTCGGTGATAGA	R	950866	950840		27
TPI-66B	TPI-66BF	TTGGGTGCCTACCAGAATCG	F	948932	948951	13776	20
	TPI-66BR	CGGGAACGATAGACGCTGAC	R	962707	962688		20
TPI-67A	ES-130F	TGTGTGAGATTCAAATCCCAAGG	F	962044	962066	9680	23
	TPI-67-R1	GTCTCGGAAGTGGATTTGTC	R	971723	971704		20
TPI-67B	67B-F	GCAGGCTTACCAGCACCTAC	F	969687	969706	8191	20
	67B-R	AGTTTCGGGTGATTGGAGTG	R	977877	977858		20
TPI-67C	67C-F	AGTACCCCGCTGACAATCAC	F	976755	976774	8842	20
	67C-R	CAGCAGTGTATCGTGCGTTC	R	985596	985577		20
TPI-68A	ES-132F	CAGCAAGGGAAAATCCTCCAC	F	985251	985271	12108	21
	TPI-68AR	GAGTAAAGCTTGTGCCAACTG	R	997358	997338		21
TPI-68B	68B-F	TCGCTTTCTACCTCCTCCAG	F	996354	996373	9743	20
	68B-R	GCTTCTTCACTGGGATCGTC	R	1006096	1006077		20
TPI-68C	68C-F	GCTGCATCGTAGAGGGTTTG	F	1005757	1005776	8268	20
	68C-R	AGTACGTCCAGCCAATCCAG	R	1014024	1014005		20
TPI-69A	ES-134F	CCATCAGCACAAAGGGTGTGT	F	1007905	1007925	8187	21
	TPI-69AF	GTGCGTTGCACCCCTATACT	R	1016091	1016072		20
TPI-69B	TPI-69BR	CTGGGGTGTTCACTGACCTT	F	1015866	1015885	6792	20
	TPI-69BF	GTCAGGCGGTGTTCTATGGT	R	1022638	1022657		20
TPI-69C	TPI-69CR	CTCAGCTTCCGGCAAGATAC	F	1022179	1022198	4101	20
	TPI-69CF	GCTCACGAAGGAGGAGTACG	R	1026279	1026260		20
TPI-69D	TPI-69DR	GCACACCCCAACTGCTTAAT	F	1025521	1025540	7142	20
	ES-137R	CAGAGTGGACCCTCGTGTTCTTAG	R	1032662	1032639		24
TPI-70A	ES-136F	CCATACACATCCATGTACTCGCAC	F	1031892	1031915	7552	24
	TPI-70AR	AACGCGGTGCATCGGTCTGTCCAC	R	1039443	1039420		24
TPI-70B	TPI-70BF	AAGCCGGGGTCTCCATCGTCCATCTT	F	1038942	1038967	7253	26
	ES-157F	AGTATTTTGCGCGTAGGCGTC	R	1046193	1046173		21
TPI-71A-A	ES-158R	GCCATAGGAAACCGTAAGACCG	F	1045435	1045456	4820	22
	71AR22	GGCAGGCATTGATTTGTACTC	R	1050254	1050234		21
TPI-71A-D	71AF18	CAAAATGGGTGGTCAGG	F	1050343	1050359	3854	17
	71AR	GTTCTGGAGCGAGCCATTAG	R	1054196	1054177		20
TPI-71A-C	71F15-Bosnia	GTAAAGCGGGTGTCAAGACG	F	1049691	1049710	801	20
	71-LuisF11rc	CCAGTACGATAAGCAGCGG	R	1050491	1050473		19
TPI-71B	TP-71BF	CAAGCGCCAGAAGATACTCC	F	1052540	1052559	5178	20
	ES-139R	CGAGGATTTTGAGCATGCCTAG	R	1057717	1057696		22
TPI-72A	ES-138F	CGTAAGTGATCGCATGTCCCTC	F	1056837	1056858	8552	22
	TP-72AR	GTGATTCAACCAACGACGTG	R	1065388	1065369		20
TPI-72B	TP-72BF	GCAACCTTCGCTCTTTGTTC	F	1064583	1064602	8543	20
	ES-155F	CGTTTGAGCACGAAGGGTACC	R	1073125	1073105		21
TPI-73	ES-156R	CACGCTGGTAATTATGGGAGAGAC	F	1072338	1072361	10361	24
	ES-141R	TTGACCTAAGCAAGGGCACCT	R	1082698	1082678		21
TPI-74A	ES-140F	GCGGTCAACAAGGTAGGAAGC	F	1082038	1082058	13699	21
	TPI-74AR	CATTCCACTTTTTCTGCGCG	R	1095736	1095717		20
TPI-74B	TPI-74BF	GCGGCATCGCAAGATATACG	F	1095317	1095336	13108	20
	ES-126F	CACAGCGAGTATTTAAGGGTGGG	R	1108424	1108402		23
TPI-75A	ES-127R	TTCTTGCCTTAATCTGTCCGAGC	F	1107726	1107748	7310	23
	TPI-75AF	TGGTGCGTCTTTCTTCTCCT	R	1115035	1115016		20
TPI-75B	TPI-75BR	ACAAAGGGCAAGAACACCAC	F	1114098	1114117	8210	20
	ES-124F	CACCTATCTTTGTGTGGTAGGGGA	R	1122307	1122284		24
TPI-76	ES-125R	ATACCATTCTTCCAGCCCCGT	F	1121473	1121493	1778	21
	ES-175R	CACCCTGACGGTGAGTCACTCA	R	1123250	1123229		22
TPI-77	ES-174F	GGTTCAATCCCAGACGGACTG	F	1122726	1122746	2823	21
	ES-177R	CCCCGTTGTTTACGTAGGAGGT	R	1125548	1125527		22
TPI-79	ES-176F	GTAACCGAATTTTGGGCACAAGT	F	1125014	1125036	5041	23
	ES-169R	GGACGTGCAGTTCCATCCTAAG	R	1130054	1130033		22
TPI-80	ES-165R	CTCAATGTGCTGTTTGTAGTCGGA	F	1128216	1128239	7949	24
	ES-153F	ACACTCCTCCTGCCTTGGAGAA	R	1136164	1136143		22
