# Supplementary material for: Genome Analysis of Treponema pallidum subsp. pallidum and subsp. pertenue Strains: Most of the Genetic Differences Are Localized in Six Regions
Source: PLoS One. 2010 Dec 29;5(12):e15713. doi: 10.1371/journal.pone.0015713 (PMC3012094; doi:10.1371/journal.pone.0015713)
Supplement: Table S2 — The list of sequenced treponemal TPI regions and the corresponding GenBank accession numbers. (XLS) [file pone.0015713.s002.xls]

## Sheet: List1
TPI interval and corresponding gene(s)	T. p. pallidum strains				T. p. pertenue strains			Simian isolate
(coordinates according to the Nichols genome [28])	Nichols	DAL-1	SS14	Mexico A	Samoa D	Gauthier	CDC-2	Fribourg-Blanc
TPI5B
TP0067					HM151365
(72649 – 73830)
TPI12A – TPI12B – TPI13	HM585242			HM585256
TP0124-TP0139	HM585259	HM585255	HM585243	HM585257	HM151364	HM585245	HM585244	HM585258
(145858 – 159660)
TPI21A
TP0259						HM151366
(270115 – 270726)
TPI21C
TP0264-TP0269		HM165232		HM585252	HM165228	HM165229	HM165230	HM165231
(275915 – 286082)
TPI25B-A
TP0315-TP0316		HM585234			HM585230	HM585231	HM585232	HM585233
(330289 – 332334)
TPI32B
TP0430-TP0441		HM585240		HM585249	HM585237	HM585239	HM585238
(458567 – 467844)
TPI34aa
TP0470					HM585241
(497154 – 498263)
TPI42A
TP0548-TP0553		HM585229		HM585228	HM245777	HM243496	HM243495	HM585227
(591597 – 600208)
TPI49
TP0629						HM151367
(687334 – 687789)
TPI55
TP0696-TP0697								HM151369
(764241 – 765747)
TPI65B
TP0858						HM151368
(934406 – 935639)
TPI71A-C
TP0967		HM585250		HM151373	HM151370	HM151371	HM151372	HM585251
(1049210 – 1050763)
TPI77
TP1029-TP1031		HM585246		HM585253	HM623430	HM585235	HM585236	HM585254
(1123045 – 1125898)
